# Supplementary material for: A dual-scale model for the caveolin-mediated vesiculation
Source: Royal Society of Chemistry journal article supplement (doi:10.1039/c3sm50956g), 2013-01-01
Supplement: c3sm50956g.pdf [file c3sm50956g.pdf]

## A dual-scale model for the caveolin-mediated vesiculation

Xudong Liang, Yan Zu, Yan-Ping Cao, Chun Yang\*

*Institute of Biomechanics and Medical Engineering, Department of Engineering  
Mechanics, Tsinghua University, Beijing 100084, China*

### Electronic supplementary information (ESI)

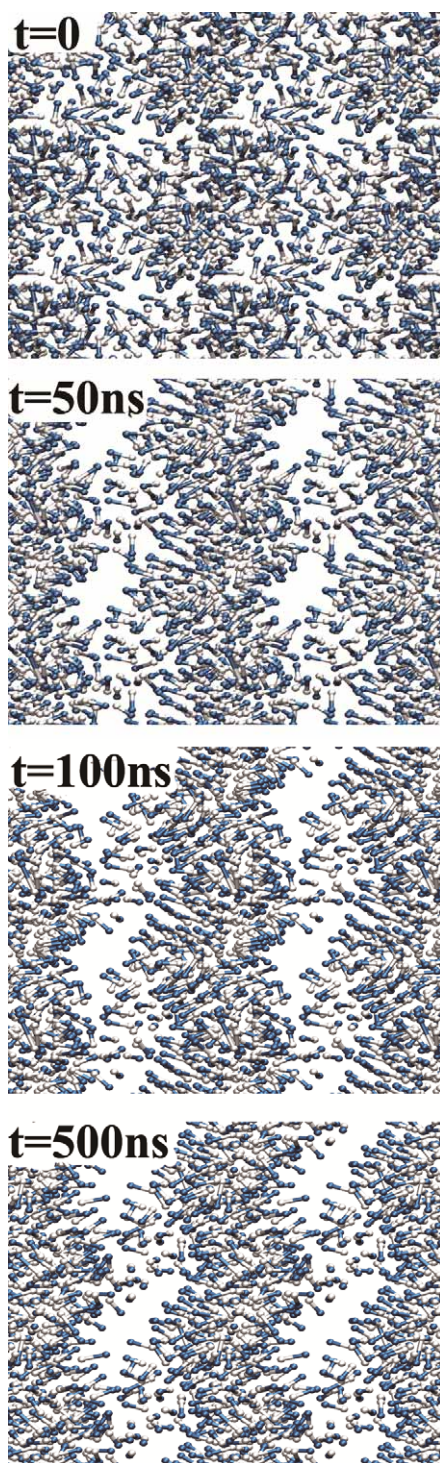

**Figure S1** Self-assemble dynamics of the two-bead lipid membrane.

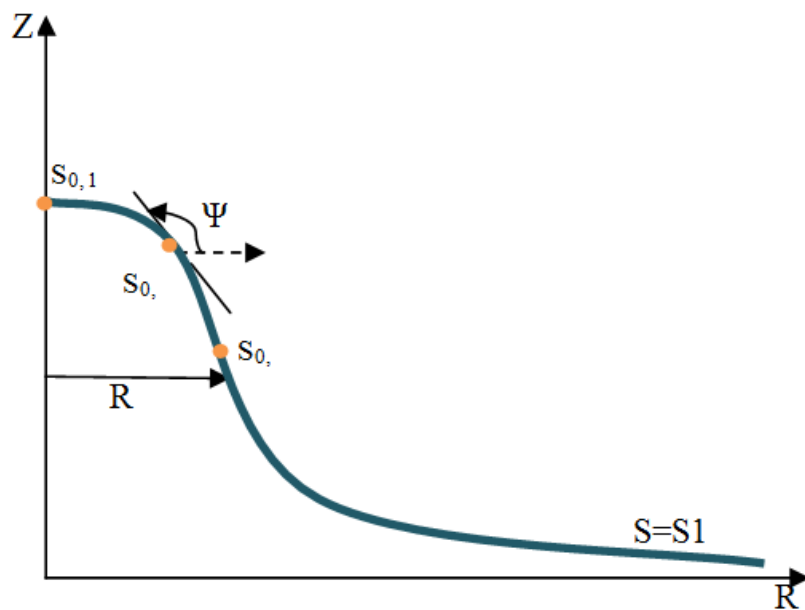

**Figure S2** A schematic of the one-dimensional membrane profile (The full membrane shape is given by rotating the curve in the z-axis by  $2\pi$ ).

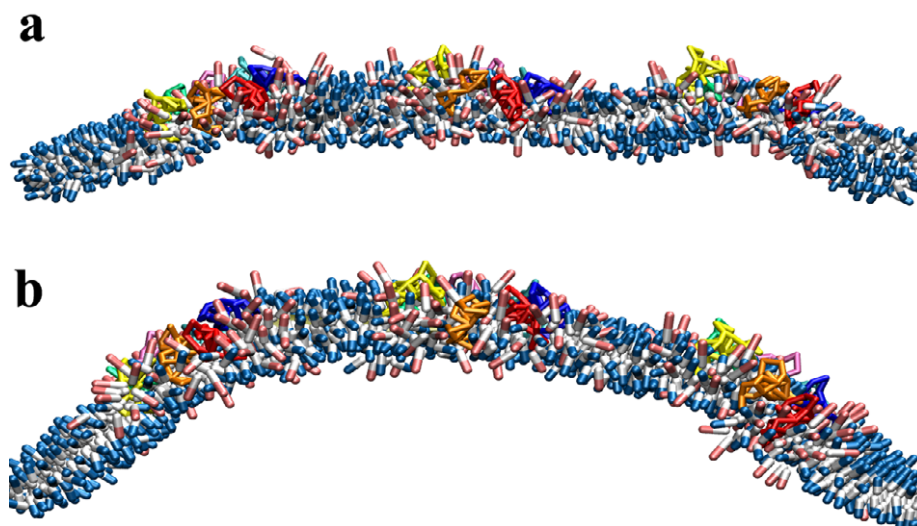

**Figure S3** A simulation of membrane morphology with three aligned caveolin oligomers. (a) A typical morphology of three independently development of local curvature. (b) The development of local bending into a curve.

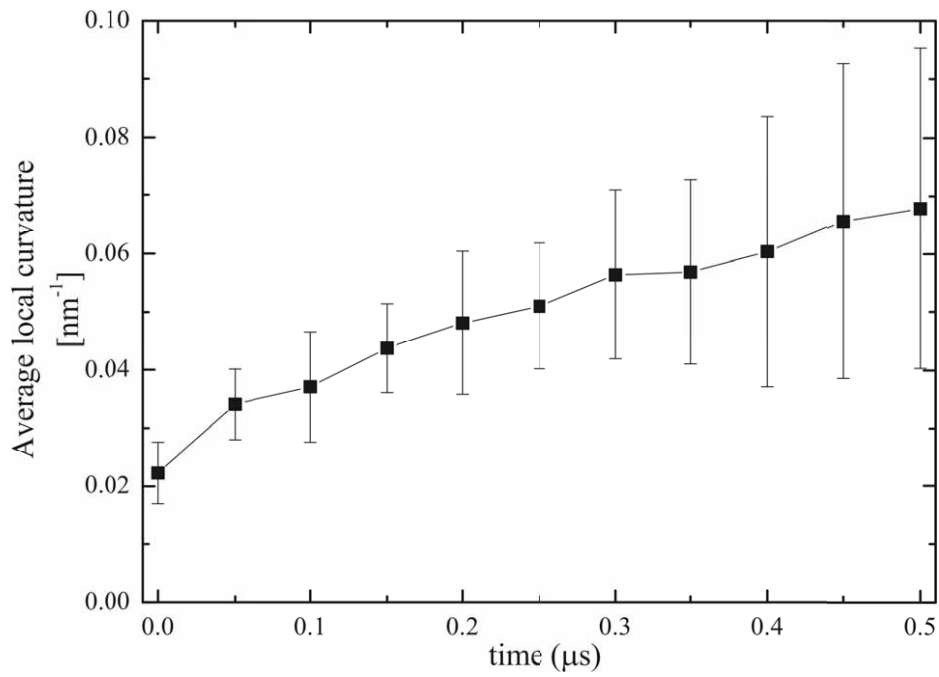

**Figure S4** Average local curvature induced by three aligned caveolin oligomers on the membrane.

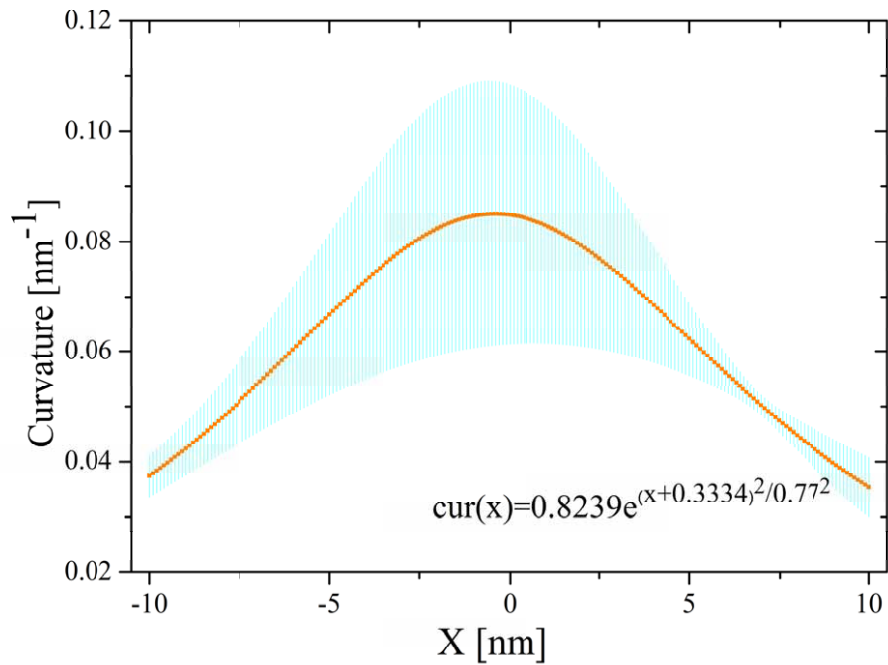

**Figure S5** Fitting for the curvature distribution of all the simulation profiles (the cyan lines) along the membrane in the configuration of SET1. The solid line is the Gaussian fitting curve.
